# Supplementary material for: FGFR2-fusions define a clinically actionable molecular subset of pancreatic cancer
Source: PubMed Central journal article supplement (PMC11408739; doi:10.1038/s41698-024-00683-x), 2024-09-17
Supplement: 41698_2024_683_MOESM1_ESM.pdf [file 41698_2024_683_MOESM1_ESM.pdf]

1 **Manuscript: *FGFR2*-fusions define a clinically actionable molecular subset of pancreas**  
2 **cancer**

3 **Supplementary Data Table of Contents**

- 4 1. Supplementary Figure 1: Treatment durability and response to chemotherapy and FGFR  
5 kinase inhibitors in patients with metastatic PDAC and *FGFR2*-fusions.
- 6 2. Supplementary Figure 2: Radiologic scans of patient 1, 2, and 4's best response.
- 7 3. Supplementary Figure 3: CONSORT flow diagram for clinical trial OSU-14078  
8 (NCT02272998) for ponatinib.
- 9 4. Supplementary Figure 4: Patient 2's RECIST scores on pemigatinib.
- 10 5. Supplementary Figure 5: CONSORT flow diagram for clinical trial OSU-19041  
11 (NCT04233567) for infigratinib.
- 12 6. Supplementary Figure 6: Patient 2's RECIST scores on infigratinib.
- 13 7. Supplementary Figure 7: Patient 3's RECIST scores on ponatinib.
- 14 8. Supplementary Figure 8: Patient 3's RECIST scores on infigratinib.
- 15 9. Supplementary Figure 9: Prevalence of *FGFR1-3* CNAs, SVs, and REs in pancreatic  
16 adenocarcinoma.
- 17 10. Supplementary Figure 10: Known gain-of-function *FGFR1-3* SVs in pancreatic  
18 adenocarcinoma.
- 19 11. Supplementary Figure 11: *FGFR1-3* short variants of unknown significance (VUS) and likely  
20 pathogenic short variants in pancreatic adenocarcinoma.
- 21 12. Supplementary Figure 12: Scheme of a Phase II, telemedicine trial with pemigatinib in  
22 unresectable or metastatic pancreatic cancer with *FGFR* genomic alterations.
- 23 13. Supplementary Table 1: Comparison of patient 1-4 demographics.
- 24 14. Supplementary Table 2: Comparison of demographics characteristics between the *FGFR1-4*  
25 rearranged and *FGFR1-4* rearrangement wildtype cohort of patients.

26

## **Supplementary Data**

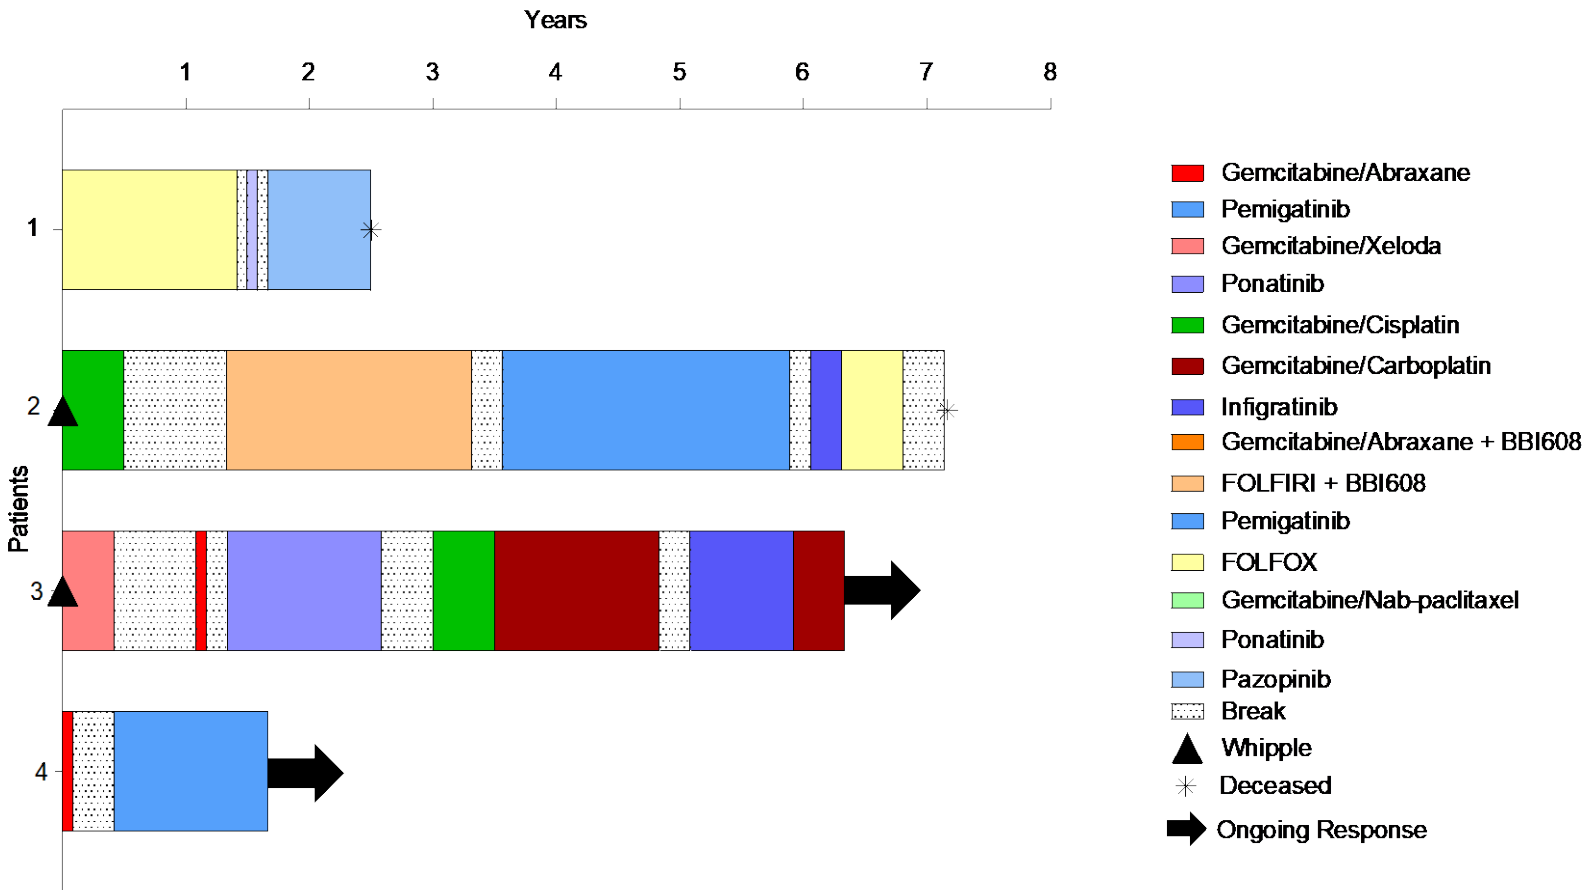

**Supplementary Figure 1. Treatment durability and response to chemotherapy and FGFR kinase inhibitors in patients with metastatic PDAC and *FGFR2*-fusions.** Patient 1 exhibited a best response of stable disease while on pazopanib for 10 months while patient 2 exhibited a partial response on pemigatinib for 28 months, patient 3 exhibited partial response to infigratinib for 10 months, and patient 4 exhibited an ongoing, partial response on off-label pemigatinib. Abbreviations: FOLFOX, folinic acid, fluorouracil, and oxaliplatin; BBI608, STAT3 inhibitor (Napabucasin); FOLFIRI, folinic acid, fluorouracil, irinotecan.

A

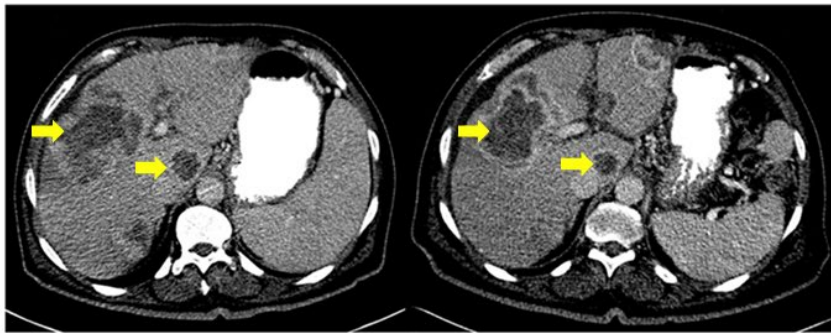

Pretreatment

Six months on FOLFOX

B

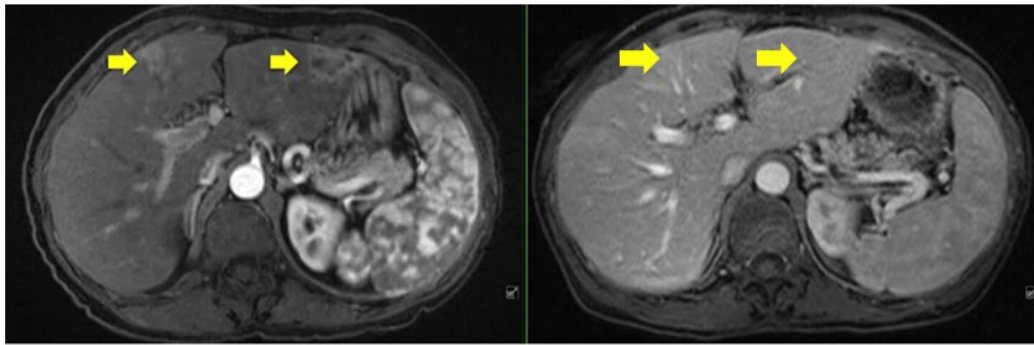

Pretreatment

Three months on pemigatinib

C

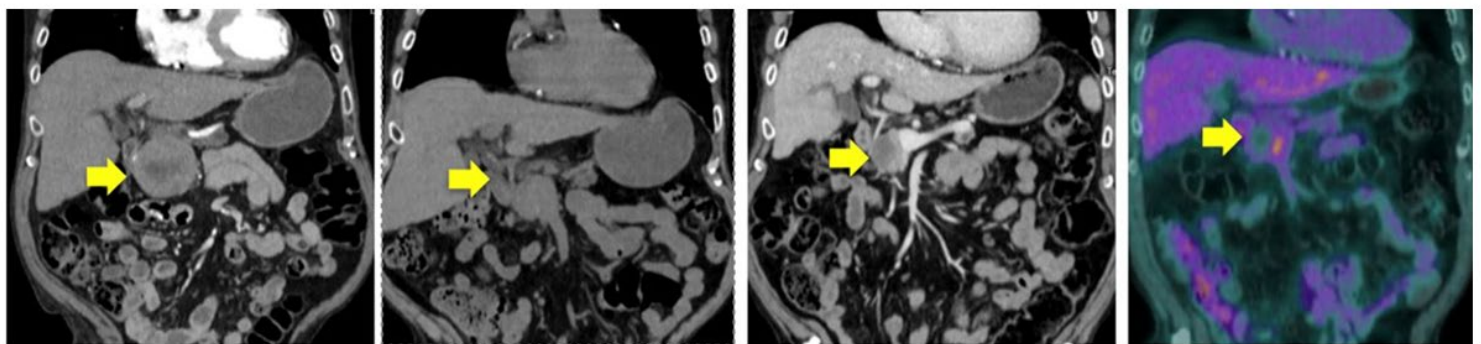

Pretreatment

Three months  
on pemigatinib

Five months  
on pemigatinib

Eight months  
on pemigatinib

**Supplementary Figure 2. Radiologic scans of patient 1, 2, and 4's best response. A,** CT scans of patient 1's best response of stable disease while on FOLFOX. **B,** MRI of patient 2's best response of partial response while on pemigatinib basket trial (NCT02393248). **C,** Pretreatment, three months, and five months on pemigatinib CT scans of patient 4's partial response to off label pemigatinib. The last scan is a PET scan due to the patient's chronic kidney disease.

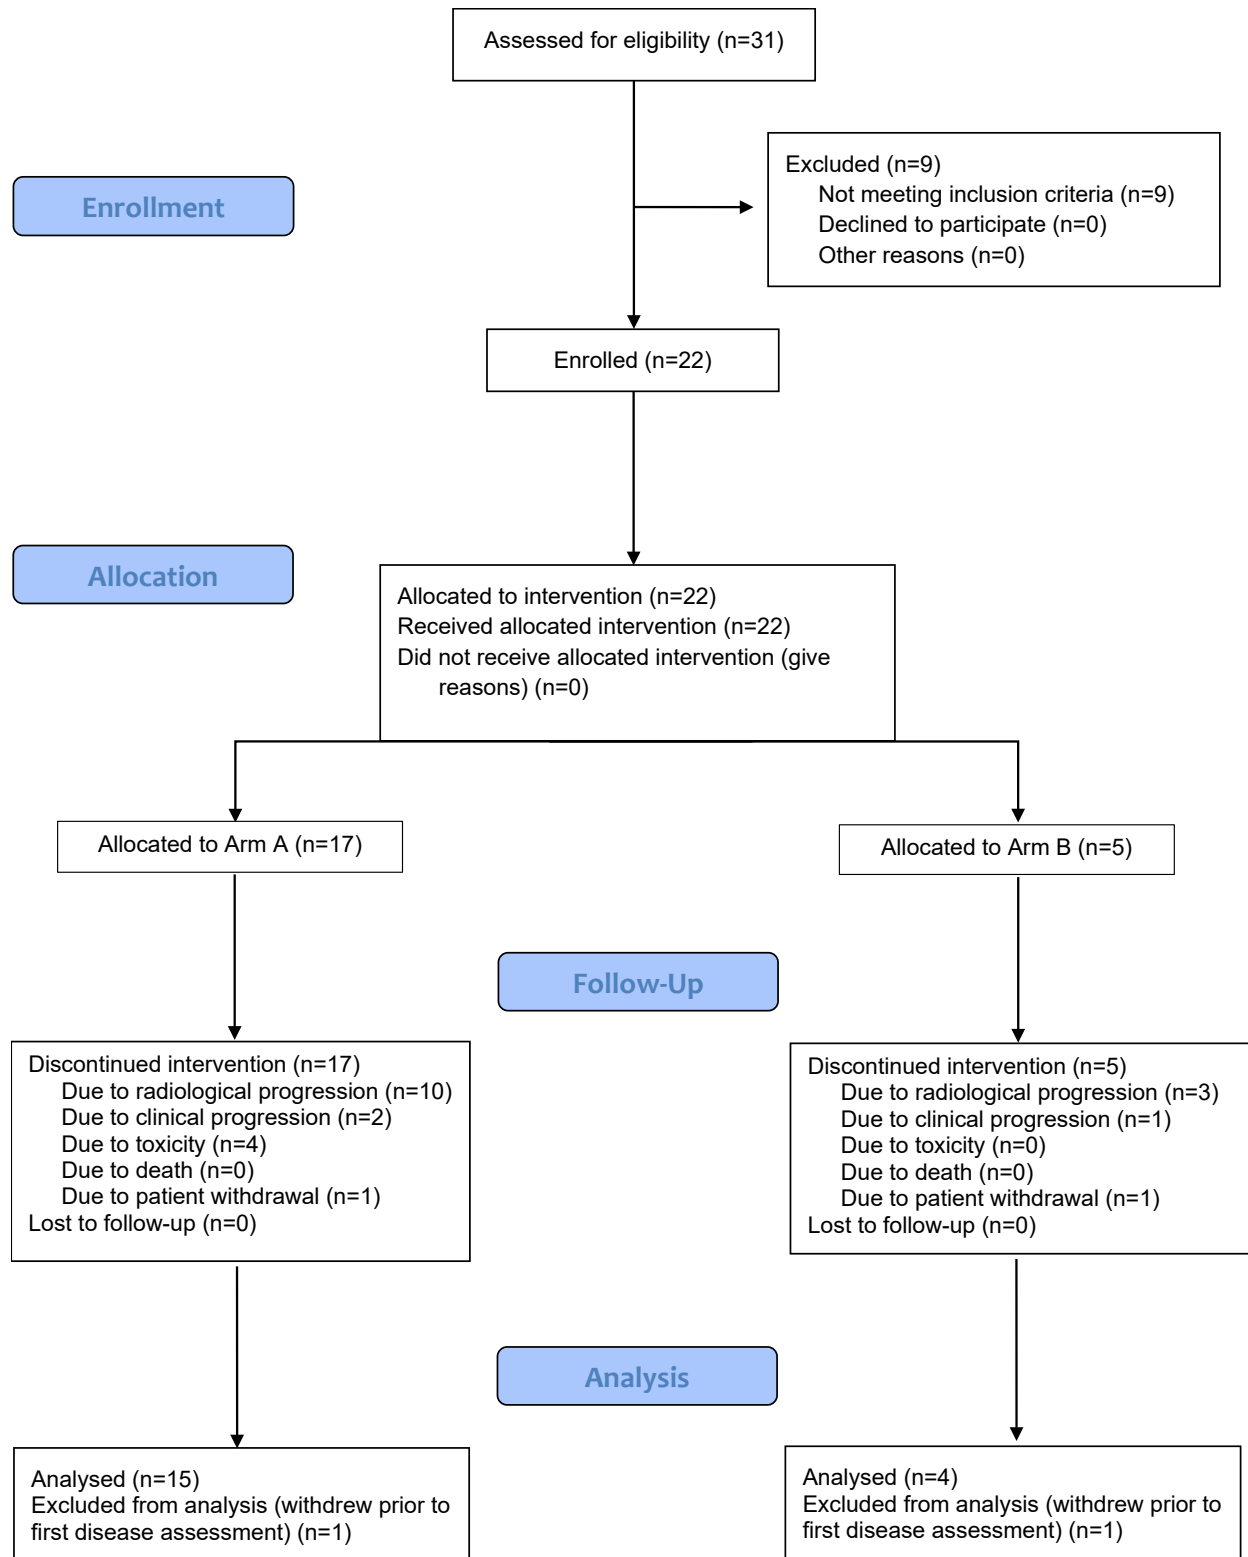

Supplementary Figure 3. CONSORT flow diagram for clinical trial OSU-14078 (NCT02272998) for ponatinib.

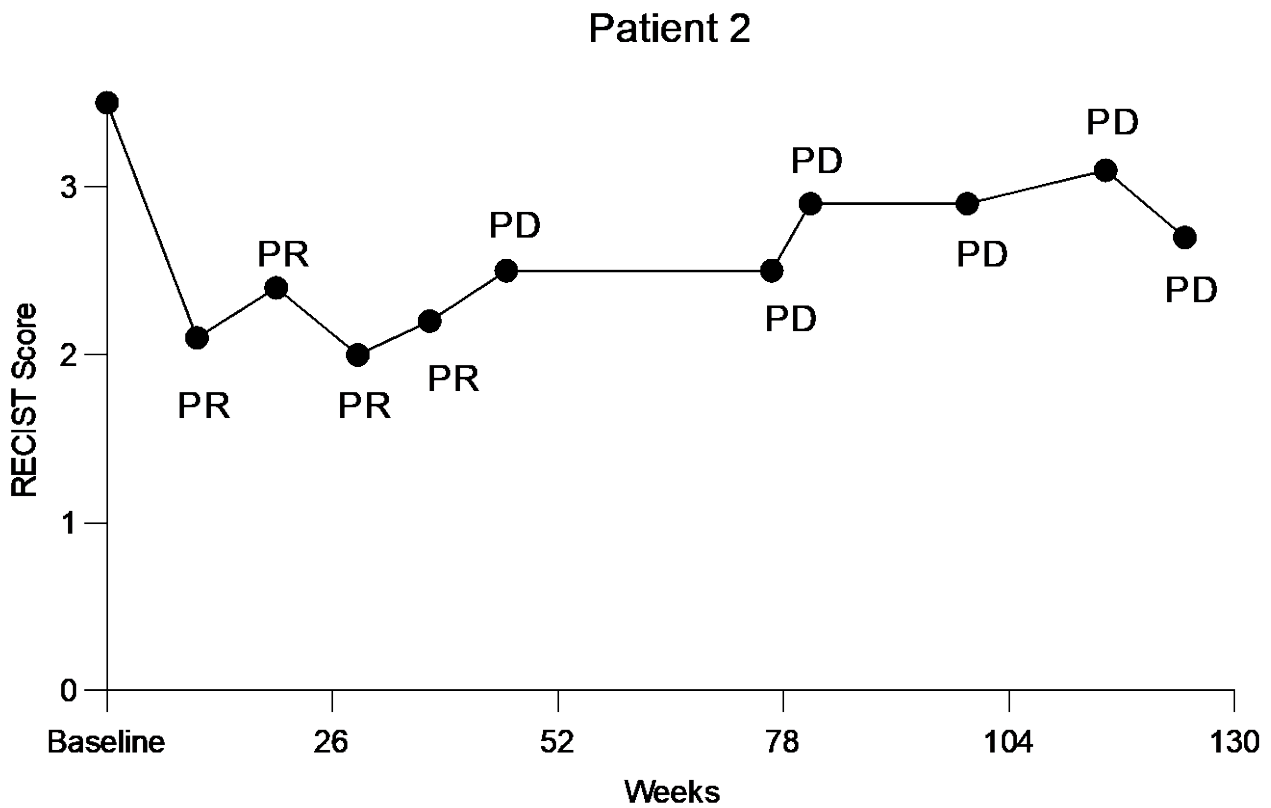

**Supplementary Figure 4. Patient 2's RECIST scores on pemigatinib.** Patient 2's response to pemigatinib according to RECIST scores starting with baseline scans at week 0 of infiratinib treatment. Even after disease progressed, Patient 2 still underwent treatment per Principal Investigator's request, since she was still clinically benefitting from being on therapy with no other disease evident. Abbreviations: PR, partial response; PD, progressive disease.

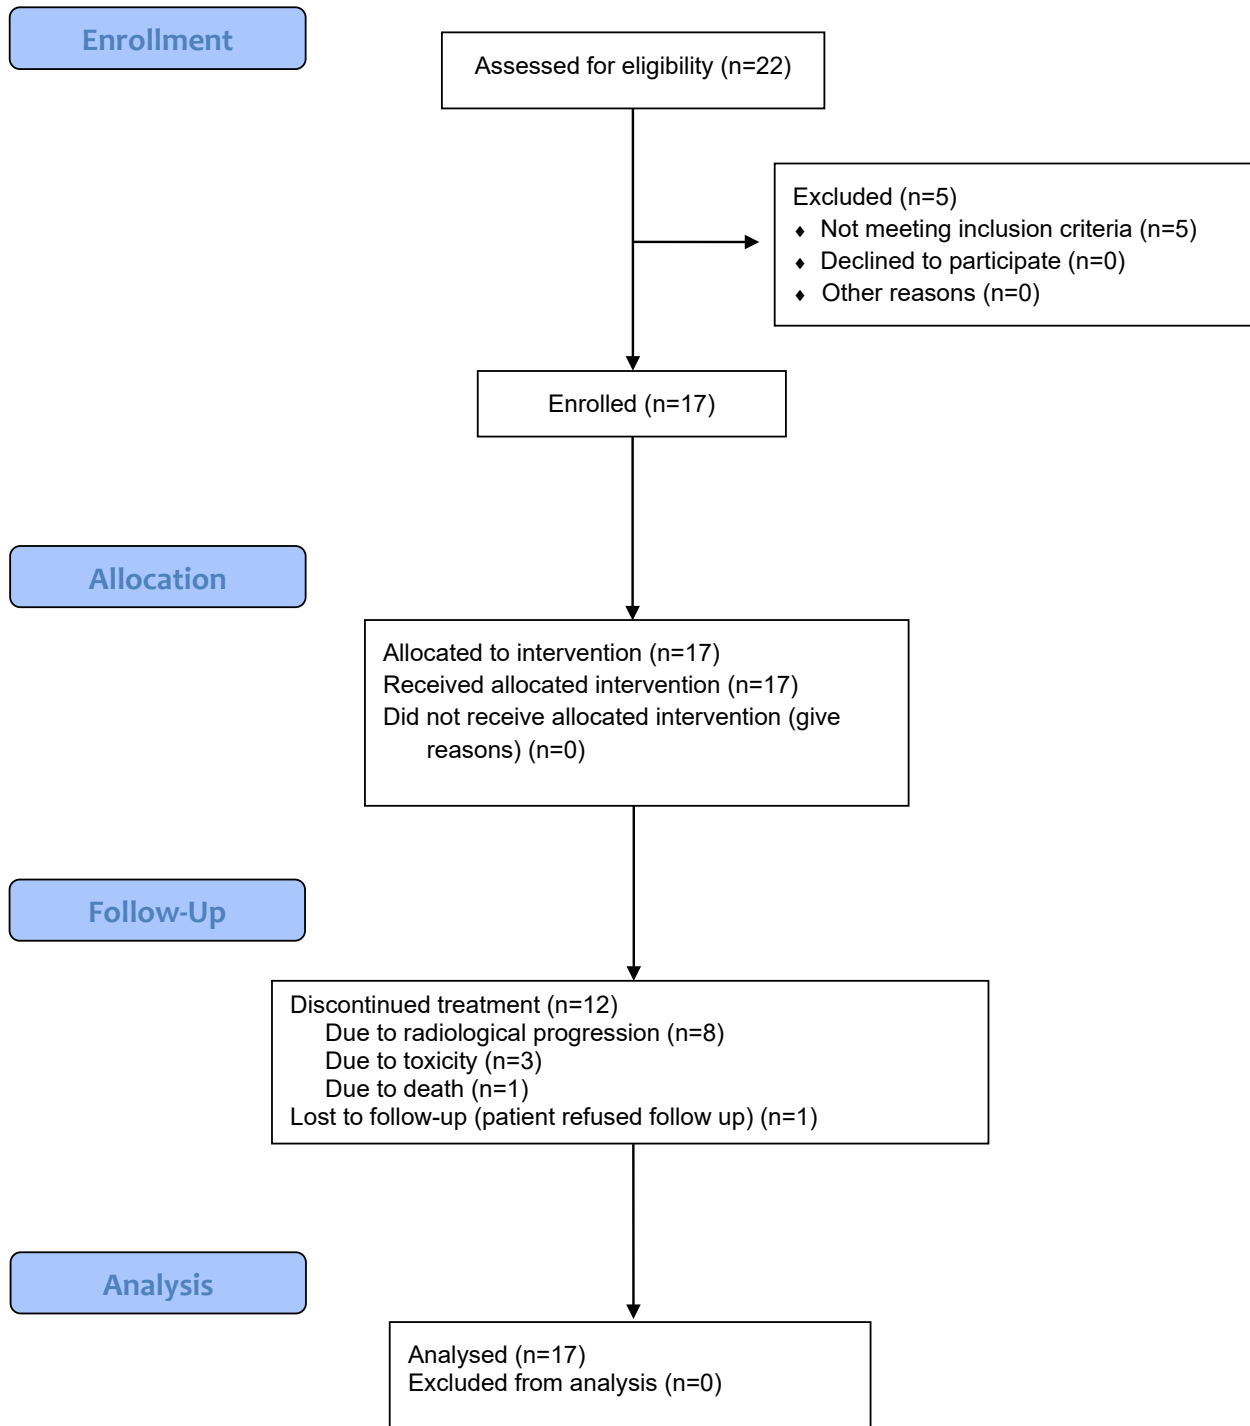

Supplementary Figure 5. CONSORT flow diagram clinical trial OSU-19041 (NCT04233567) for ifiglatinib.

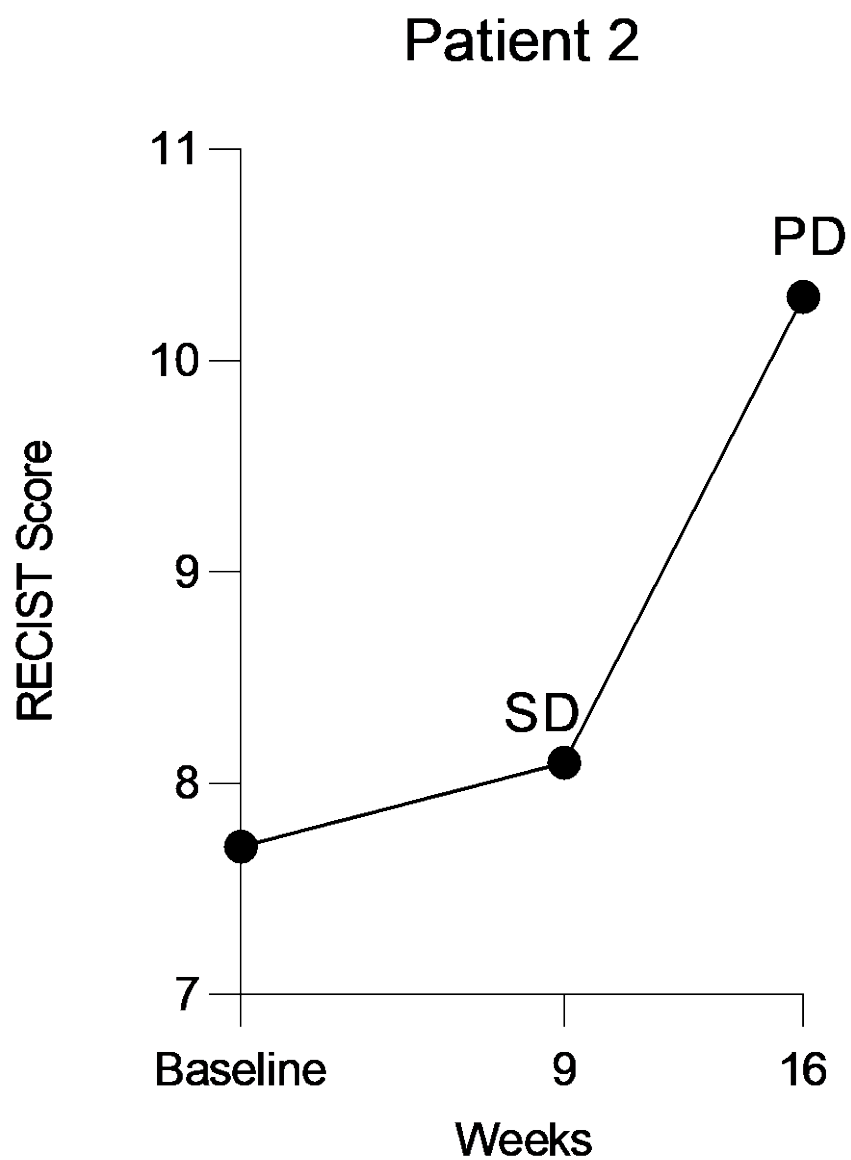

**Supplementary Figure 6. Patient 2's RECIST scores on imfinid. Patient 2's response to imfinid according to RECIST scores starting with baseline scans at week 0 of imfinid treatment. Abbreviations: SD, stable disease; PD, progressive disease.**



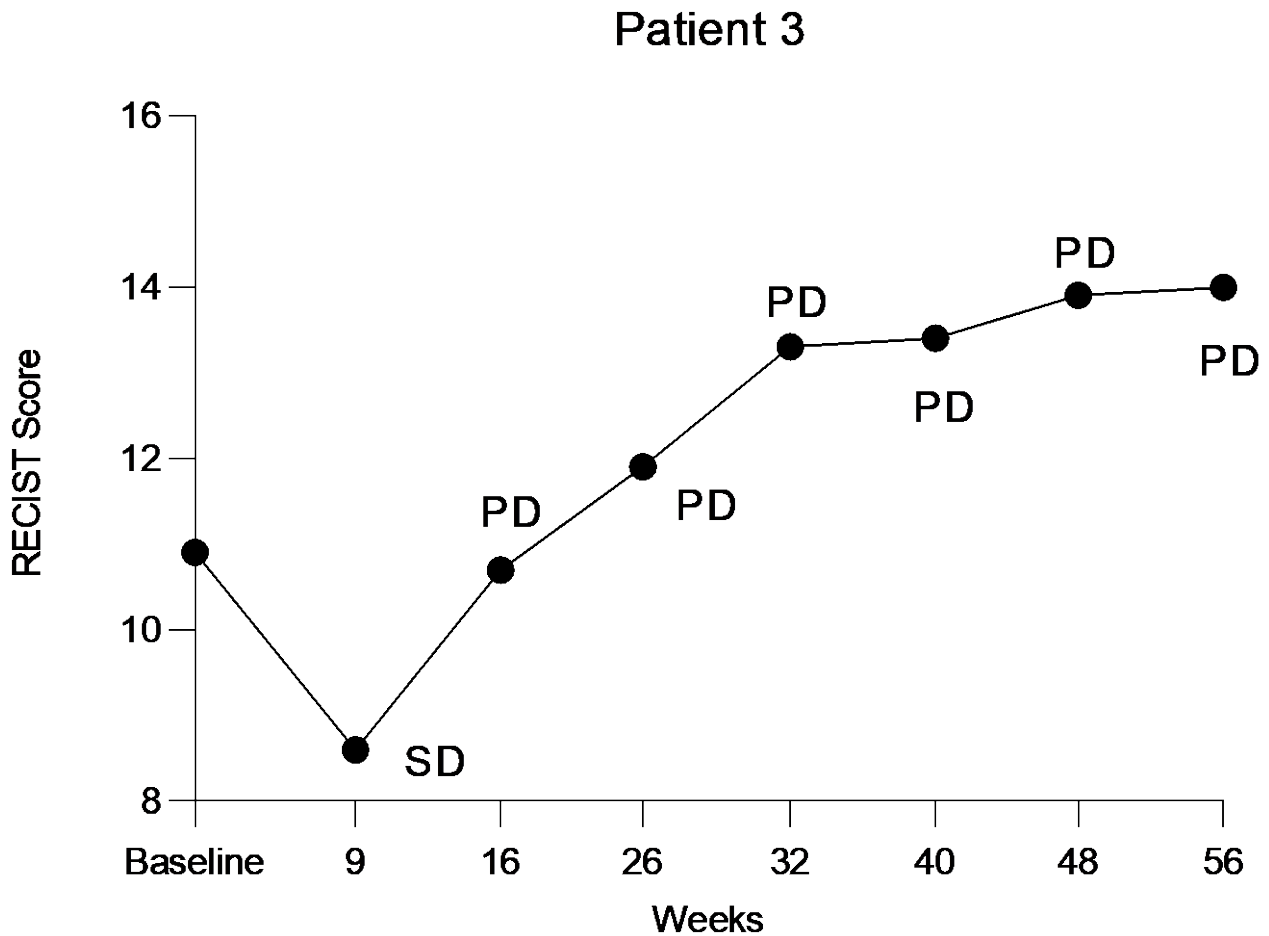

**Supplementary Figure 7. Patient 3's RECIST scores on ponatinib.** Patient 2's response to ponatinib according to RECIST scores starting with baseline scans at week 0 of ponatinib treatment. Treatment with ponatinib was continued after progressive disease was documented per Principal Investigator's request due to a decrease in CA19-9, clinical benefit, and disease control outside of one of the target lesions. Abbreviations: SD, stable disease; PR, partial response; PD, progressive disease.

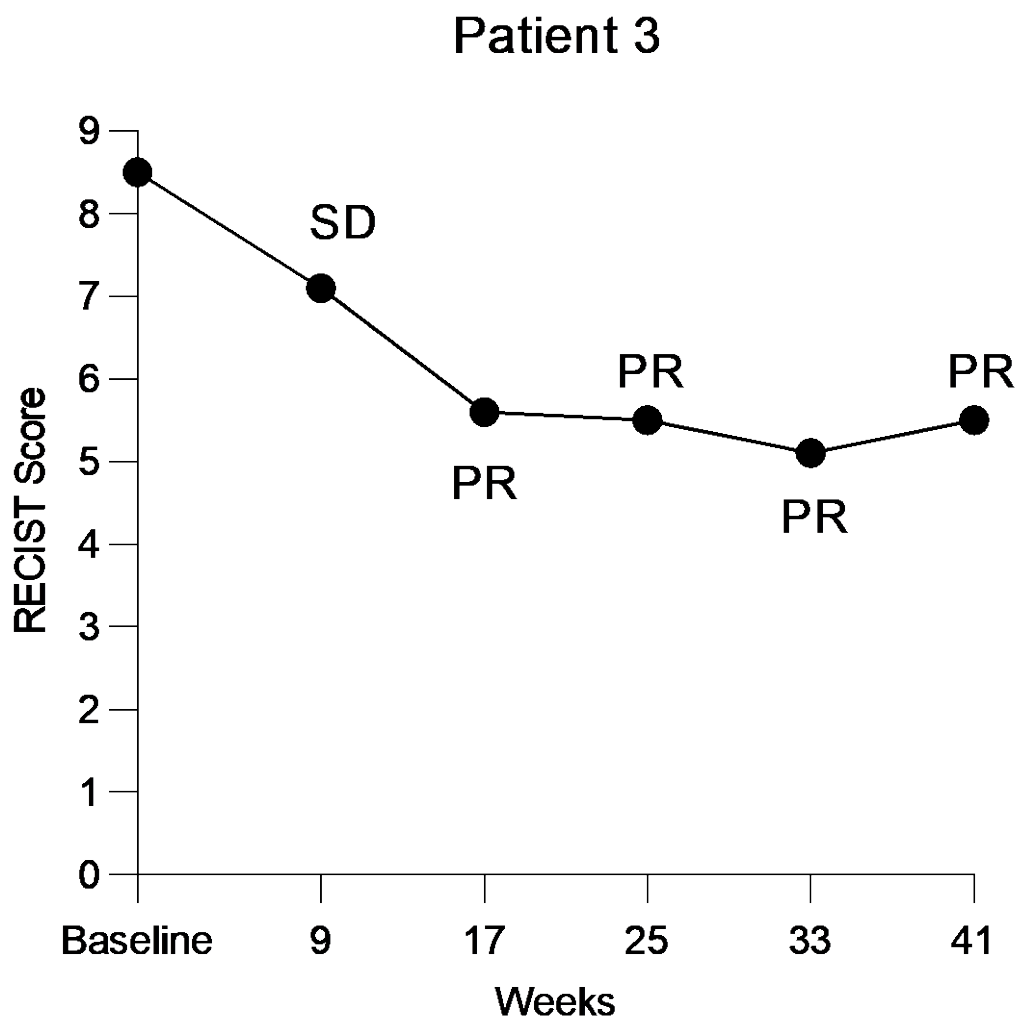

**Supplementary Figure 8. Patient 3's RECIST scores on infigratinib.** Patient 3's response to infigratinib according to RECIST scores starting with baseline scans at week 0 of infigratinib treatment. Abbreviations: SD, stable disease; PR, partial response; PD, progressive disease.

**A**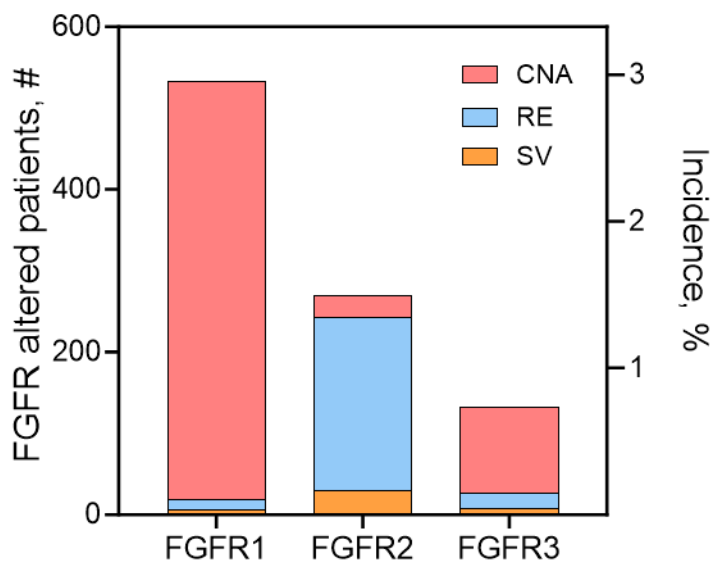**B**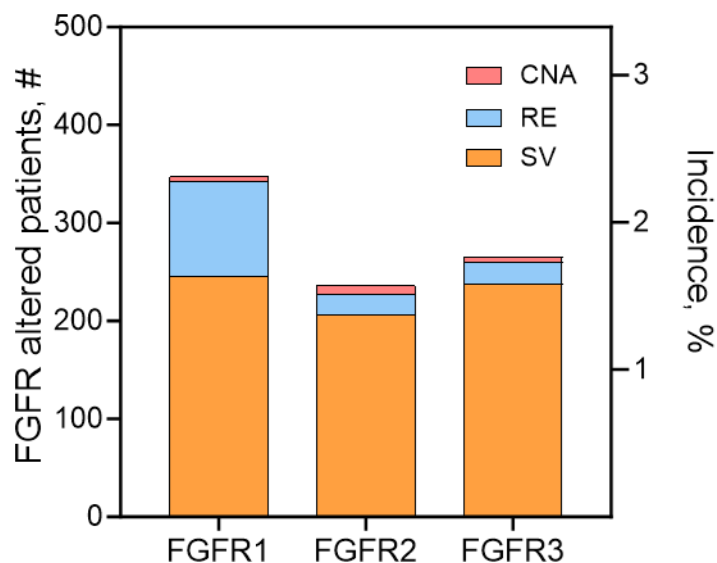

**Supplementary Figure 9. Prevalence of *FGFR1-3* CNAs, SVs, and REs in pancreatic adenocarcinoma.** **A**, *FGFR1-3* known pathogenic *FGFR1-3* alterations in pancreatic adenocarcinoma. CNAs were most observed in *FGFR1* while REs are most observed in *FGFR2*. There are very little REs and SVs with known function in *FGFR4*. **B**, *FGFR1-3* likely pathogenic and variants of unknown significance in pancreatic adenocarcinoma. REs of unknown function are most observed in *FGFR1* while SVs of unknown function occur similarly across *FGFR1-3*. This highlights the ongoing need to characterize these alterations that still have unknown function.

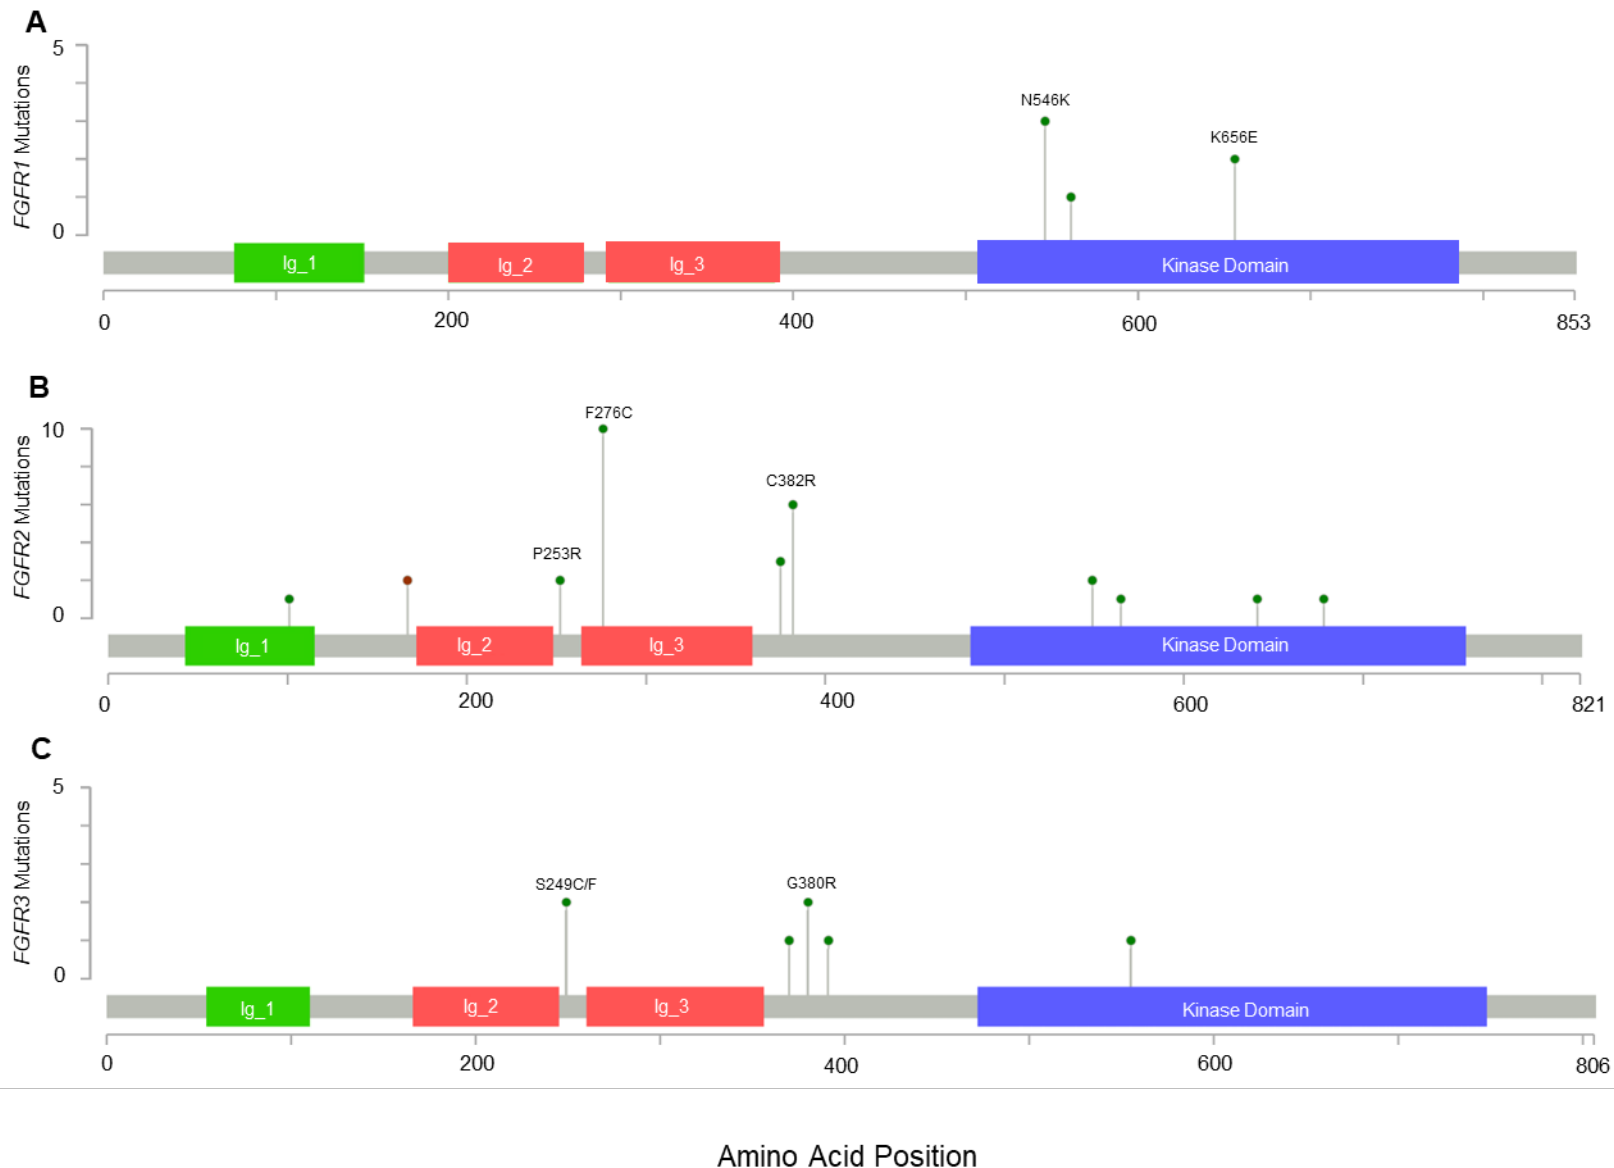

**Extended Figure 10. Known gain-of-function *FGFR1-3* SVs in pancreatic adenocarcinoma.** Lollipop depiction of the most common known SVs (N=18) **A**, *FGFR1* (3), **B**, *FGFR2* (10), and **C**, *FGFR3* (5) missense (green dots) alterations and in-frame indels (brown dots) observed in *FGFR*-altered pancreatic cancer. Each alteration is represented by protein domain location and frequency (height). Figure was generated using cBioPortal MutationMapper<sup>1,2</sup>.

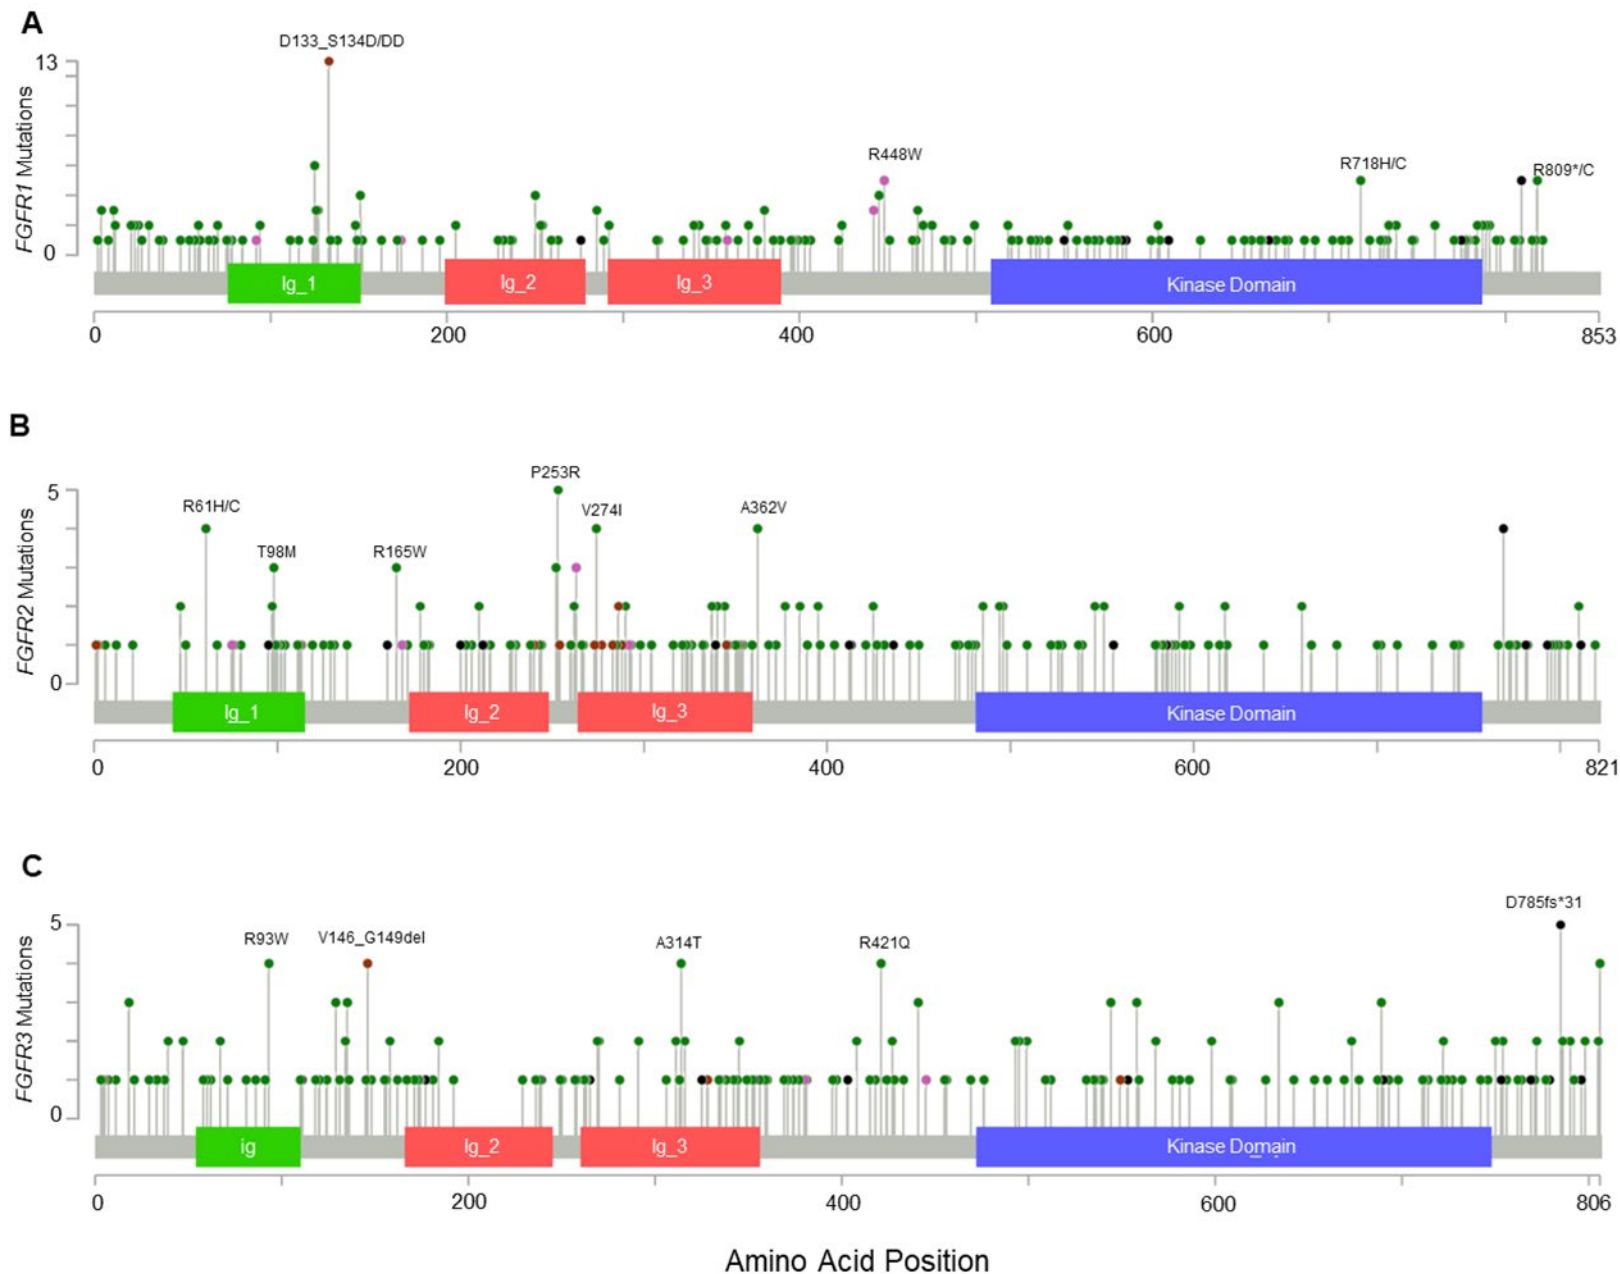

**Supplementary Figure 11. *FGFR1-3* short variants of unknown significance (VUS) and likely pathogenic short variants in pancreatic adenocarcinoma.** Lollipop depiction of unknown function SVs (N=563) **A**, *FGFR1* (188), **B**, *FGFR2* (183), and **C**, *FGFR3* (192) missense (green dots) alterations, truncating alterations including nonsense, nonstop, frameshift indels, and splice sites (black dots), and in-frame indels (brown dots), and all other alterations (pink dots) observed in *FGFR*-altered pancreatic cancer. Some of the likely pathogenic *FGFR* SVs include *FGFR1* S125L, *FGFR1* R445W, *FGFR1* G818R, *FGFR2* P253R, *FGFR2* Y769\*, *FGFR2* M537I, *FGFR2* 372C, and *FGFR3* R621H. These SVs labeled as likely pathogenic are rare *FGFR* mutations that warrant further investigation. Each alteration is represented by protein domain location and frequency (height). Figure was generated using cBioPortal MutationMapper<sup>1,2</sup>.

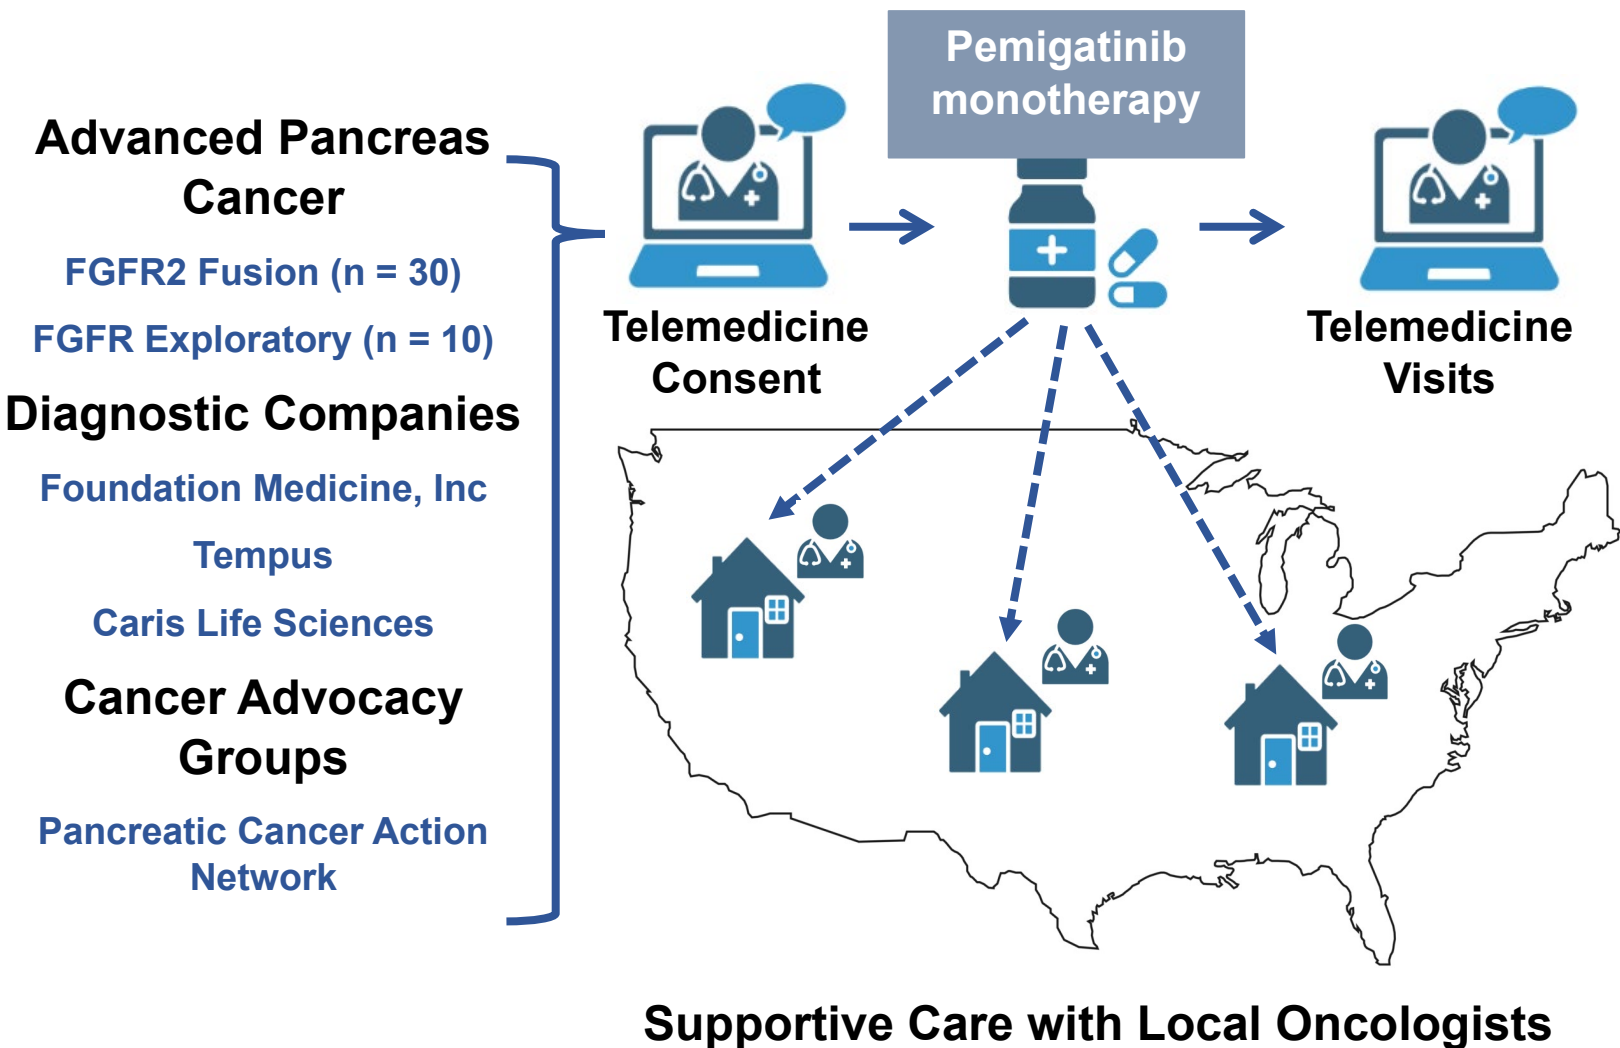

Supplementary Figure 12. Scheme of a Phase II, telemedicine trial with pemigatinib in unresectable or metastatic pancreatic cancer with *FGFR* genomic alterations.

| Variable                    | Patient 1                                                         | Patient 2                                                                                                                      | Patient 3                                                                                                                                    | Patient 4                                  |
|-----------------------------|-------------------------------------------------------------------|--------------------------------------------------------------------------------------------------------------------------------|----------------------------------------------------------------------------------------------------------------------------------------------|--------------------------------------------|
| Age (at diagnosis)          | 61                                                                | 44                                                                                                                             | 71                                                                                                                                           | 79                                         |
| Gender                      | Male                                                              | Female                                                                                                                         | Male                                                                                                                                         | Male                                       |
| Race                        | African American                                                  | White                                                                                                                          | White                                                                                                                                        | White                                      |
| Cancer Histology            | Poorly differentiated carcinoma                                   | Moderately differentiated adenocarcinoma                                                                                       | Adenocarcinoma                                                                                                                               | Adenocarcinoma                             |
| # of systemic therapies     | 4                                                                 | 7                                                                                                                              | 6                                                                                                                                            | 2                                          |
| Systemic therapies          | Gemcitabine/nab-paclitaxel;<br>FOLFOX;<br>Ponatinib;<br>Pazopanib | Gemcitabine/Cisplatin;<br>Gemcitabine/nab-paclitaxel/BB1608;<br>FOLFIRI/BB1608;<br>Pemigatinib;<br>Infigratinib;<br>FOLFIRINOX | Gemcitabine/Capecitabine;<br>Gemcitabine/nab-paclitaxel;<br>Ponatinib;<br>Gemcitabine/Cisplatin;<br>Gemcitabine/Carboplatin;<br>Infigratinib | Gemcitabine/nab-paclitaxel;<br>Pemigatinib |
| Genomic alteration          | FGFR2-INA;<br>FGFR2 amplification                                 | FGFR2-USP33                                                                                                                    | FGFR2-CEP55                                                                                                                                  | FGFR2-INA;<br>FGFR2 amplification          |
| Smoking status (pack years) | 21                                                                | 0                                                                                                                              | 0                                                                                                                                            | 15                                         |

Supplementary Table 1. Comparison of Patient 1-4 demographics.

|                                         |     | <b><i>FGFR1-4 RE mt</i></b><br><b>(N=245)</b> | <b><i>FGFR1-4 RE wt</i></b><br><b>(N=29984)</b> |
|-----------------------------------------|-----|-----------------------------------------------|-------------------------------------------------|
| Gender: Males (n, %) <sup>1</sup>       |     | 116 (47.3)                                    | 15995 (53.3)                                    |
| Median age (IQR; years) <sup>2</sup>    |     | 61 [52-69]                                    | 66 [59-73]                                      |
| Age ≥ 18 years (n, %)                   |     | 244 (99.6)                                    | 29943 (99.9)                                    |
| Genomic ancestry<br>(n, %) <sup>3</sup> | AFR | 27 (11.0)                                     | 2831 (9.4)                                      |
|                                         | AMR | 15 (6.1)                                      | 1444 (4.8)                                      |
|                                         | EAS | 11 (4.5)                                      | 1024 (3.4)                                      |
|                                         | EUR | 184 (75.1)                                    | 23526 (78.5)                                    |
|                                         | SAS | 2 (0.8)                                       | 229 (0.8)                                       |
| Metastatic (n, %) <sup>4</sup>          |     | 204 (78.4)                                    | 14849 (49.1)                                    |

**Supplementary Table 2. Comparison of demographics characteristics between the *FGFR1-4* rearranged and *FGFR1-4* rearrangement wildtype cohort of patients.** Gender variable had a missingness rate of 0.03% (n=10). Age variable had a missingness rate of 0.08% (n=25) in the dataset. Median age comparison was significant by Wilcoxon rank sum test, P=2.3e-10. Genomic ancestry variable had a missingness rate of 3.1% (n=936). Metastatic variable had a missingness rate of 8.1% (n=2457) in the dataset. Abbreviations: AFR, Africa; AMR, Americas; EAS, East-Asia; EUR, Europe; SAS, South-Asia



## References

- 27 1. Cerami, E., *et al.* The cBio cancer genomics portal: an open platform for exploring  
28 multidimensional cancer genomics data. *Cancer Discov* **2**, 401-404 (2012).  
29 2. Gao, J., *et al.* Integrative analysis of complex cancer genomics and clinical profiles using  
30 the cBioPortal. *Sci Signal* **6**, p11 (2013).
